# Supplementary material
Source: publisher figshare collection journal article supplement (https://asha.figshare.com/articles/dataset/_/7849394)
Supplement: Supplementary file 1 [file 1]

### Supplemental Material S3. Linear mixed models with hearing history.

| Span direction | Random intercept variance | Predictors                        | <i>t</i>      | <i>p</i>        |
|----------------|---------------------------|-----------------------------------|---------------|-----------------|
| Forward        | 1.03, <i>SD</i> = 1.00    | <b>CTONI-2</b>                    | <b>4.6</b>    | <b>&lt; .01</b> |
|                |                           | Age at identification of deafness | −0.4          | .72             |
|                |                           | Preimplant residual hearing       | −0.2          | .85             |
|                |                           | Age at fit of CI                  | 0.6           | .55             |
|                |                           | Duration of CI use                | 1.1           | .27             |
|                |                           | Bilateral implantation            | −1.6          | .11             |
|                |                           | <b>Stimulus (digits–objects)*</b> | <b>−8.0</b>   | <b>&lt; .01</b> |
|                |                           | <b>Stimulus (digits–symbols)</b>  | <b>−15.11</b> | <b>&lt; .01</b> |
|                |                           | <b>Stimulus (objects–symbols)</b> | <b>−7.2</b>   | <b>&lt; .01</b> |
| Backward       | 0.99, <i>SD</i> = 0.99    | <b>CTONI-2</b>                    | <b>3.9</b>    | <b>&lt; .01</b> |
|                |                           | Age at identification of deafness | −1.1          | .28             |
|                |                           | Preimplant residual hearing       | 0.5           | .63             |
|                |                           | Age at fit of CI                  | 1.0           | .32             |
|                |                           | <b>Duration of CI use</b>         | <b>2.2</b>    | <b>.03</b>      |
|                |                           | Bilateral implantation            | −0.5          | .64             |
|                |                           | <b>Stimulus (digits–objects)</b>  | <b>−5.5</b>   | <b>&lt; .01</b> |
|                |                           | <b>Stimulus (digits–symbols)</b>  | <b>−8.2</b>   | <b>&lt; .01</b> |
|                |                           | <b>Stimulus (objects–symbols)</b> | <b>−2.8</b>   | <b>&lt; .01</b> |

*Note.* CTONI-2 = Comprehensive Test of Nonverbal Intelligence–Second Edition (Hammill, Pearson, & Wiederholt, 2009); CI = cochlear implant.

\*A minus sign (−) denotes the effect of changing levels of the variable *stimulus*—for example, the variance due to shifting stimuli from digits to objects.

### Reference

Hammill, D. D., Pearson, N. A., & Wiederholt, J. L. (2009). *Comprehensive Test of Nonverbal Intelligence–Second Edition*. Austin, TX: Pro-Ed.
